# Supplementary material for: Causes of Death and Cardiovascular Comorbidities in Adults With Congenital Heart Disease
Source: PubMed Central journal article supplement — J Am Heart Assoc. 2020 Jul 11;9(14):e016400. doi: 10.1161/JAHA.119.016400 (PMC7660712; doi:10.1161/jaha.119.016400), 2020-07-11
Supplement: JAH3-9-e016400-s001.pdf [file JAH3-9-e016400-s001.pdf]

# **SUPPLEMENTAL MATERIAL**

**Table S1. CHD ICD-9 Codes and Severity Groupings.**

| <b>Category</b> | <b>ICD-9-CM<br/>Code</b> | <b>Code Description</b>                         |
|-----------------|--------------------------|-------------------------------------------------|
| <b>SEVERE</b>   | 745.0                    | Common Truncus                                  |
|                 | 745.1                    | Transposition of the Great Arteries (TGA)       |
|                 | 745.10                   | Complete TGA (dextro-TGA)                       |
|                 | 745.11                   | DORV, or incomplete TGA                         |
|                 | 745.12                   | Corrected TGA (levo-TGA)                        |
|                 | 745.19                   | Other TGA                                       |
|                 | 745.2                    | Tetralogy of Fallot                             |
|                 | 745.3                    | Single Ventricle, or cor triloculare            |
|                 | 745.6                    | Endocardial Cushion Defect (AVSD)               |
|                 | 745.60                   | Endocardial Cushion Defect (AVSD) unspecified   |
|                 | 745.69                   | Endocardial Cushion Defect, Other               |
|                 | 746.01                   | Pulmonary valve atresia or absence              |
|                 | 746.1                    | Tricuspid atresia, stenosis or absence          |
|                 | 746.7                    | Hypoplastic left heart syndrome                 |
|                 | 747.11                   | Interrupted aortic arch                         |
|                 | 747.41                   | Total anomalous pulmonary venous return (TAPVR) |
| <b>SHUNT</b>    | 745.4                    | Ventricular septal defect                       |
|                 | 745.5                    | Atrial septal defect (ASD) (secundum) or PFO    |
|                 | 745.61                   | ASD (primum)                                    |
|                 | 745.8                    | Other specified defect of septal closure        |
|                 | 745.9                    | Unspecified defect of septal closure            |
|                 | 747.0                    | PDA                                             |
|                 | 747.42                   | Partial anomalous venous return (PAPVR)         |
| <b>VALVE</b>    | 746.0                    | Anomalies of pulmonary valve                    |

|                                                                                |                 |                                                         |
|--------------------------------------------------------------------------------|-----------------|---------------------------------------------------------|
|                                                                                | 746.00          | Pulmonary valve anomaly, unspecified                    |
|                                                                                | 746.02          | Pulmonary valve stenosis                                |
|                                                                                | 746.09          | Pulmonary valve anomaly, other                          |
|                                                                                | 746.2           | Ebstein's Anomaly                                       |
|                                                                                | 746.3           | Aortic valve stenosis                                   |
|                                                                                | 746.4           | Aortic insufficiency or bicuspid/unicuspid aortic valve |
|                                                                                | 746.5           | Mitral stenosis or mitral valve abnormalities           |
|                                                                                | 746.6           | Mitral insufficiency                                    |
|                                                                                | 746.81          | Subaortic stenosis                                      |
|                                                                                | 746.83          | Infundibular or subvalvar pulmonary stenosis            |
|                                                                                | 747.10 or 747.1 | Coarctation of aorta                                    |
|                                                                                | 747.22          | Atresia or stenosis of aorta                            |
|                                                                                | 747.3           | Anomalies of Pulmonary artery                           |
|                                                                                | 747.31          | Pulmonary artery atresia, coarctation, or hypoplasia    |
|                                                                                | 747.39          | Anomalies of Pulmonary artery, other                    |
| <b>OTHER ONLY</b><br><i>(case only has one or more codes in this category)</i> | 745.7           | Cor biloculare                                          |
|                                                                                | 746.8           | Other Specified anomalies of heart                      |
|                                                                                | 746.82          | Cor triatriatum                                         |
|                                                                                | 746.84          | Obstructive anomalies of heart                          |
|                                                                                | 746.85          | Coronary artery anomaly                                 |
|                                                                                | 746.87          | Malposition of heart or apex                            |
|                                                                                | 746.89          | Other specified anomaly of heart (various types)        |
|                                                                                | 746.9           | Unspecified defect of heart                             |
|                                                                                | 747.2           | Other anomaly of the aorta                              |
|                                                                                | 747.20          | Anomalies of aorta, unspecified                         |
|                                                                                | 747.21          | Anomaly of aortic arch                                  |
|                                                                                | 747.29          | Other anomaly of aorta                                  |
|                                                                                | 747.4           | Anomalies of great veins                                |

|  |        |                                                                                            |
|--|--------|--------------------------------------------------------------------------------------------|
|  | 747.40 | Anomalies of great veins, unspecified                                                      |
|  | 747.49 | Other anomalies of great veins                                                             |
|  | 747.9  | Unspecified anomalies of circulatory system                                                |
|  | 648.5X | Congenital Cardiovascular disorder complicating pregnancy, childbirth or puerperium        |
|  | V13.65 | Personal history of corrected congenital malformations of the heart and circulatory system |
